# Supplementary material for: Identification and Analysis of Novel Viral and Host Dysregulated MicroRNAs in Variant Pseudorabies Virus-Infected PK15 Cells
Source: PubMed Central journal article supplement (PMC4801506; doi:10.1371/journal.pone.0151546), 2016-03-21

-----GCAGGCGCGGCATGGAGGT----- 4  
 -----GCGCGCATGGAGGTGACGG----- 1

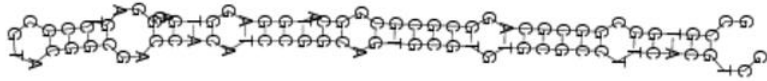

**prv-miR-7**

GGCCTTCTTCTACCCGGCGCCCGTGAACGCGCTCTTTGCCTGCGCCGACCACCTCGGCATGCGCGACGTGGGCGCCGAGGTGCGCGCCGCG 8  
 (((..... (((((((((((((( (. ((((. ..... ((((((((. ....)))))))).)))))).)))))).))))). ....)). -48.90 (kcal/mol)

\*\*\*\*\*TACCCGGCGCCCGTGAACGCGCTC\*\*\*\*\* prv-miR-7-5p 5  
 \*\*\*\*\*CGCGACGTGGGCGCCGAGGTG\*\*\*\*\* prv-miR-7-3p 2

-----TACCCGGCGCCCGTGAACGCGCTC----- 4  
 -----TACCCGGCGCCCGTGAACGCGCTCT----- 1  
 -----CGCGACGTGGGCGCCGAGGTG----- 2  
 -----GTGGGCGCCGAGGTGCGCGCCGCG----- 1

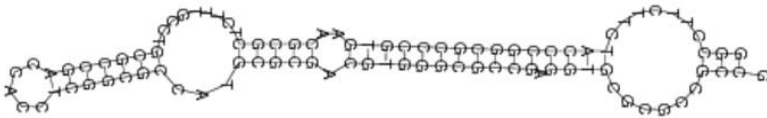

**prv-miR-8**

GGCGGTGGCGCTGCGCGTGGGCGCGCGAGCTGATCTTACCTACGACGAGCTCCTGCCGCCCGCACGCGTACAACG 10  
 . (. ((((((( (. ((( (. ((( (. ((( (. ((( (. ..... )))))))).)))))).)))))).))))). -38.40 (kcal/mol)

\*\*\*\*\*CGAGTCTGCGGCCCGCACG\*\*\*\*\* prv-miR-8-3p 9

-----CGCGAGCTGATCTTACCTACG----- 1  
 -----GACGAGTCTGCGGCCCGCACGCG----- 2  
 -----CGAGTCTGCGGCCCGCAC----- 1  
 -----CGAGTCTGCGGCCCGCAC----- 6

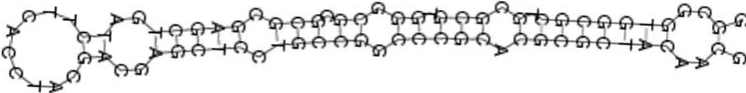

**prv-miR-9**



prv-miR-11

CTGTCCCTCATCCACTTCTCGACGGCCGGCTCCCCGCGGGGCGGGGGTGCGGGGGGTGGGTGGGTGATAGA 29  
 (((((( (((((((((((((( (. (((((( (((((...))))))...))))))...))))))...))))). )))))). -46.00 (kcal/mol)  
 \*\*\*\*\*TCCACTTCTCGACGGCCGGCTCC\*\*\*\*\* prv-miR-11-5p 28  
 -----TCCACTTCTCGACGGCCGGCTCC----- 27  
 -----CACTTCTCGACGGCCGGCTCCC----- 1  
 -----GGGGGTGGGTGGGTGATA----- 1

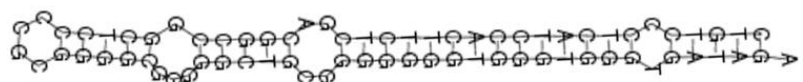

prv-miR-12

CATTGGCTCCCCTCGCGCCACGCGTCCGCGTCGTCATCGTCCC GCCCAATCGGGTGGCAGCGGGGAGGCTGGGAG 414  
 .. (((((( (((((((((((((( (. (((((( (((((...))))))...))))))...))))))...))))). )))))). -42.90 (kcal/mol)  
 \*\*\*\*\*CCTCGCGCCACGCGGTCCGCGTCC\*\*\*\*\* prv-miR-12-5p 6  
 \*\*\*\*\*CCAATCGGGTGGCAGCGGGG\*\*\*\*\* prv-miR-12-3p 400  
 -----CCTCGCGCCACGCGGTCCGCGTCC----- 2  
 -----CCTCGCGCCACGCGGTCCGCGTCC----- 2  
 -----TCGCGCCACGCGGTCCGCGTCC----- 1  
 -----GCGCCACGCGGTCCGCGT----- 1  
 -----CGCCACGCGGTCCGCGTCC----- 1  
 -----CGCGGTCCGCGTCCGCGTCC----- 1  
 -----TCGTCATCGTCCC GCCG----- 1  
 -----CGTCATCGTCCC GCCG----- 1  
 -----GTCATCGTCCC GCCG----- 1  
 -----GTCATCGTCCC GCCCAATC----- 2  
 -----GCGGCCAATCGGGTGGCAGCGGGG----- 1  
 -----CGGCCAATCGGGTGGCAGCGGGG----- 1  
 -----GCCAATCGGGTGGCAGCGGGG----- 10  
 -----GCCAATCGGGTGGCAGCGGGG----- 2  
 -----GCCAATCGGGTGGCAGCGGGGAG----- 2  
 -----CCAATCGGGTGGCAGCGGG----- 10

|       |                               |     |
|-------|-------------------------------|-----|
| ----- | CCAATCGGGTGGCAGCGGGG-----     | 2   |
| ----- | CCAATCGGGTGGCAGCGGGGG-----    | 235 |
| ----- | CCAATCGGGTGGCAGCGGGGA-----    | 2   |
| ----- | CAATCGGGTGGCAGCGGG-----       | 7   |
| ----- | CAATCGGGTGGCAGCGGG-----       | 1   |
| ----- | CAATCGGGTGGCAGCGGGGG-----     | 89  |
| ----- | CAATCGGGTGGCAGCGGGGA-----     | 2   |
| ----- | CAATCGGGTGGCAGCGGGGAGGC-----  | 7   |
| ----- | AATCGGGTGGCAGCGGGGG-----      | 9   |
| ----- | AATCGGGTGGCAGCGGGGA-----      | 1   |
| ----- | AATCGGGTGGCAGCGGGGAGGC-----   | 2   |
| ----- | ATCGGGTGGCAGCGGGGG-----       | 3   |
| ----- | ATCGGGTGGCAGCGGGGAG-----      | 1   |
| ----- | ATCGGGTGGCAGCGGGGAGGC-----    | 2   |
| ----- | TCGGGTGGCAGCGGGGAG-----       | 10  |
| ----- | TCGGGTGGCAGCGGGGAGGCTGG-----  | 1   |
| ----- | TCGGGTGGCAGCGGGGAGGCTGGA----- | 1   |

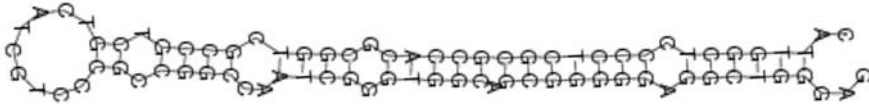

**prv-miR-13**

CGCGCGCCCCGGGAAGGGTCGGGCGATGGCCGCGCCACCGCCCCACCCTTCCCCGGACCCCTCCCGCC 1000  
 .(((.(.(.(((((((((.((((.((((....))))).))))).))))).))....).)).) -42.80(kcal/mol)

\*\*\*\*\*CCGGGAAGGGTCGGGCGATG\*\*\*\*\* prv-miR-13-5p 983

\*\*\*\*\*CGCCCCACCCTTCCCCGGACC\*\*\*\*\* prv-miR-13-3p 9

|       |                             |   |
|-------|-----------------------------|---|
| ----- | CGCGCGCCCCGGGAAGGGTCGG----- | 1 |
| ----- | CGCGCGCCCCGGGAAGGGTCGG----- | 2 |
| ----- | GCGCGCCCCGGGAAGGGTCGG-----  | 3 |
| ----- | CCCCGGGAAGGGTCGG-----       | 1 |
| ----- | CCCCGGGAAGGGTCGGG-----      | 2 |
| ----- | CCCCGGGAAGGGTCGGCG-----     | 2 |
| ----- | CCCCGGGAAGGGTCGGCGA-----    | 6 |

|                                     |     |
|-------------------------------------|-----|
| -----CCCCGGGAAGGGTCGGGCGAT-----     | 47  |
| -----CCCCGGGAAGGGTCGGGCGATG-----    | 68  |
| -----CCCCGGGAAGGGTCGGGCGATGG-----   | 14  |
| -----CCCCGGGAAGGGTCGGGCGATGGC-----  | 36  |
| -----CCCCGGGAAGGGTCGGGCGATGGCC----- | 6   |
| -----CCCGGGAAGGGTCGGGC-----         | 1   |
| -----CCCGGGAAGGGTCGGGCG-----        | 2   |
| -----CCCGGGAAGGGTCGGGCGA-----       | 1   |
| -----CCCGGGAAGGGTCGGGCGAT-----      | 19  |
| -----CCCGGGAAGGGTCGGGCGATG-----     | 7   |
| -----CCCGGGAAGGGTCGGGCGATGG-----    | 2   |
| -----CCCGGGAAGGGTCGGGCGATGGC-----   | 15  |
| -----CCCGGGAAGGGTCGGGCGATGGCC-----  | 14  |
| -----CCGGGAAGGGTCGGGCGA-----        | 4   |
| -----CCGGGAAGGGTCGGGCGAT-----       | 22  |
| -----CCGGGAAGGGTCGGGCGATG-----      | 309 |
| -----CCGGGAAGGGTCGGGCGATGG-----     | 42  |
| -----CCGGGAAGGGTCGGGCGATGGC-----    | 54  |
| -----CCGGGAAGGGTCGGGCGATGGCC-----   | 35  |
| -----CGGGAAGGGTCGGGCGAT-----        | 2   |
| -----CGGGAAGGGTCGGGCGATG-----       | 107 |
| -----CGGGAAGGGTCGGGCGATGG-----      | 22  |
| -----CGGGAAGGGTCGGGCGATGGC-----     | 110 |
| -----CGGGAAGGGTCGGGCGATGGCC-----    | 12  |
| -----GGGAAGGGTCGGGCGATG-----        | 1   |
| -----GGGAAGGGTCGGGCGATGG-----       | 5   |
| -----GGGAAGGGTCGGGCGATGGC-----      | 6   |
| -----GGGAAGGGTCGGGCGATG-----        | 1   |
| -----GGGAAGGGTCGGGCGATGG-----       | 3   |
| -----GGGAAGGGTCGGGCGATGGC-----      | 2   |
| -----GGAAGGGTCGGGCGATGGCCG-----     | 3   |
| -----GAAGGGTCGGGCGATGGCCGCCA-----   | 2   |
| -----CCGCCCCACCCTTCCCCGGACC-----    | 9   |



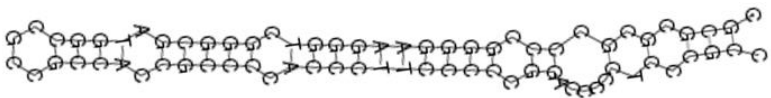

**prv-miR-14**

CGACACGGCGCCTCGGGCCGACGTGAACCGCTCTTTCGCGCATCGCCGTCTCGGCCGCCGACGTGAC 50  
 ... ((((((((( (. ((((((.... (((. ((((. ....)))))))).)))))).))))).))))).))))).. -32.00(kcal/mol)

\*\*\*\*\*CGCCTCGGGCCGACGTGAACC\*\*\*\*\* prv-miR-14-5p 39  
 \*\*\*\*\*GCGGCATCGCCGTCTCGGCCG\*\*\*\*\* prv-miR-14-3p 10

|                                  |    |
|----------------------------------|----|
| -----CGCCTCGGGCCGACGTGAA-----    | 1  |
| -----CGCCTCGGGCCGACGTGAACC-----  | 33 |
| -----CCTCGGGCCGACGTGAAC-----     | 1  |
| -----CCTCGGGCCGACGTGAACCGC-----  | 3  |
| -----CTCGGGCCGACGTGAACC-----     | 1  |
| -----GGCCGACGTGAACCGCTCT-----    | 1  |
| -----GCGGCATCGCCGTCTCGGCCG-----  | 8  |
| -----CATCGCCGTCTCGGCCGCCGAC----- | 2  |

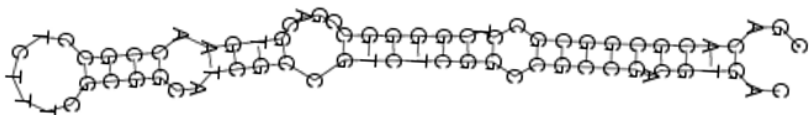

**prv-miR-15**

GCCCCGAGCCTCTCCGCGAGACGACCCCGGCCCCGTCACCGAGGTCCCAGTCCCTCGGCCGAGGTCTGGAC 7  
 .. (((. ((((. . ((((((. ((. (. ((((. ((. . . . .)))))))).))))).))))).))))).. -38.30(kcal/mol)

\*\*\*\*\*TCTCCGCGAGACGACCCCGGGC\*\*\*\*\* prv-miR-15-5p 7

|                                  |   |
|----------------------------------|---|
| -----TCTCCGCGAGACGACCCCGG-----   | 2 |
| -----TCTCCGCGAGACGACCCCGGGC----- | 3 |
| -----TCTCCGCGAGACGACCCCGGGC----- | 1 |
| -----TCGCGAGACGACCCCGGGC-----    | 1 |

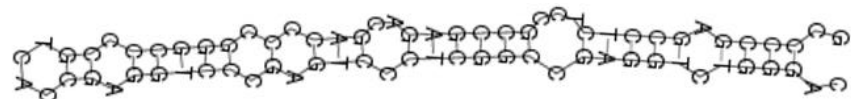

**prv-miR-16**

GGCGCGCTCCGCGCTCCCCGCCCTGGGCGGGGATGCCGCGCCGACGAGCGCACGCGGGCGCGGGCGGGAGGGAGGGAGGAAGGG 96  
..... (((. ((. ((((((((((((((. ((. ... ((. ((((((...)))...)))...)))...)))...)))...)))...)))... -58.90(kcal/mol)  
\*\*\*\*\*CGCGGGCGGGAGGGAGGGA\*\*\*\*\* prv-miR-16-3p 96

|                                |    |
|--------------------------------|----|
| -----CGCGGGCGGGAGGGAGGG-----   | 1  |
| -----CGCGGGCGGGAGGGAGGGA-----  | 2  |
| -----GCGCGGGCGGGAGGGAGGGA----- | 1  |
| -----CGCGGGCGGGAGGGAGGGA-----  | 86 |
| -----GCGGGCGGGAGGGAGGG-----    | 1  |
| -----CGGGCGGGAGGGAGGGA-----    | 5  |

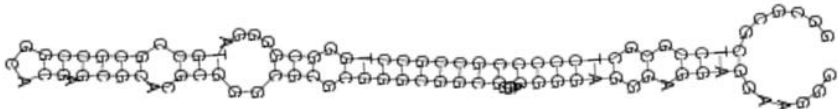

**prv-miR-17**

GACCCCGGTGCGACGGAAGGGGCAGGCTCGGCGGCCGATGCGATCCGCGAGCCGCCCGTCCGCGCCCGGAAGCCGG 5690  
..... (((. ((. ((((((((((((((. ((. ... ((. ((((((...)))...)))...)))...)))...)))...)))... -50.70(kcal/mol)  
\*\*\*\*\*GCGACGGAAGGGCAGGCTCGGC\*\*\*\*\* prv-miR-17-5p 5635  
\*\*\*\*\*CGGAGCCCGCCCGTCCGCGCC\*\*\*\*\* prv-miR-17-3p 37

|                                    |    |
|------------------------------------|----|
| ----CCCGGTGCGACGGAAGGGGCAGG-----   | 1  |
| ----CCCGGTGCGACGGAAGGGGCAGGCT----- | 1  |
| ----CGGTGCGACGGAAGGGGCAGG-----     | 1  |
| ----CGGTGCGACGGAAGGGGCAGGCTC-----  | 5  |
| ----GGTGCACGGAAGGGGCAGG-----       | 2  |
| ----GTGCGACGGAAGGGGCAGGCTCGG-----  | 2  |
| ----TGCGACGGAAGGGGCAGGCT-----      | 2  |
| ----TGCGACGGAAGGGGCAGGCTC-----     | 1  |
| ----TGCGACGGAAGGGGCAGGCTCG-----    | 12 |
| ----TGCGACGGAAGGGGCAGGCTCGG-----   | 36 |
| ----TGCGACGGAAGGGGCAGGCTCGGC-----  | 1  |
| ----TGCGACGGAAGGGGCAGGCTCGGCG----- | 18 |
| ----GCGACGGAAGGGGCAGGCT-----       | 2  |

|                                      |      |
|--------------------------------------|------|
| -----GCGACGGAAGGGGCAGGCTC-----       | 3    |
| -----GCGACGGAAGGGGCAGGCTCG-----      | 57   |
| -----GCGACGGAAGGGGCAGGCTCGG-----     | 281  |
| -----GCGACGGAAGGGGCAGGCTCGGC-----    | 291  |
| -----GCGACGGAAGGGGCAGGCTCGGC-----    | 2190 |
| -----GCGACGGAAGGGGCAGGCTCGGCGC-----  | 7    |
| -----GCGACGGAAGGGGCAGGCTCGGCGCG----- | 7    |
| -----CGACGGAAGGGGCAGGCTC-----        | 3    |
| -----CGACGGAAGGGGCAGGCTCGG-----      | 10   |
| -----CGACGGAAGGGGCAGGCTCGGC-----     | 31   |
| -----CGACGGAAGGGGCAGGCTCGGCG-----    | 1148 |
| -----CGACGGAAGGGGCAGGCTCGGCGC-----   | 2    |
| -----CGACGGAAGGGGCAGGCTCGGCGCG-----  | 10   |
| -----GACGGAAGGGGCAGGCTCG-----        | 3    |
| -----GACGGAAGGGGCAGGCTCGG-----       | 29   |
| -----GACGGAAGGGGCAGGCTCGGC-----      | 33   |
| -----GACGGAAGGGGCAGGCTCGGCG-----     | 1083 |
| -----GACGGAAGGGGCAGGCTCGGCGC-----    | 2    |
| -----GACGGAAGGGGCAGGCTCGGCGCG-----   | 2    |
| -----GACGGAAGGGGCAGGCTCGGCGCGCC----- | 2    |
| -----ACGGAAGGGGCAGGCTCGG-----        | 5    |
| -----ACGGAAGGGGCAGGCTCGGC-----       | 10   |
| -----ACGGAAGGGGCAGGCTCGGCG-----      | 164  |
| -----ACGGAAGGGGCAGGCTCGGCGC-----     | 1    |
| -----ACGGAAGGGGCAGGCTCGGCGCG-----    | 4    |
| -----ACGGAAGGGGCAGGCTCGGCGCGC-----   | 3    |
| -----ACGGAAGGGGCAGGCTCGGCGCGCC-----  | 1    |
| -----CGGAAGGGGCAGGCTCGG-----         | 4    |
| -----CGGAAGGGGCAGGCTCGGC-----        | 14   |
| -----CGGAAGGGGCAGGCTCGGCG-----       | 113  |
| -----CGGAAGGGGCAGGCTCGGCGC-----      | 2    |
| -----CGGAAGGGGCAGGCTCGGCGCG-----     | 37   |
| -----CGGAAGGGGCAGGCTCGGCGCGC-----    | 1    |

```

-----GGAAGGGCAGGCTCGGC----- 2
-----GGAAGGGCAGGCTCGGCG----- 4
-----GGAAGGGCAGGCTCGGCGCG----- 1
-----GAAGGGCAGGCTCGGCG----- 4
-----GAAGGGCAGGCTCGGCGCG----- 2
-----GAAGGGCAGGCTCGGCGCG----- 1
-----AAGGGCAGGCTCGGCGCG----- 2
-----CGGAGCCCGCCCCGTCCGCGCC----- 6
-----CGGAGCCCGCCCCGTCCGCGCC----- 20
-----GGAGCCCGCCCCGTCCGCGCC----- 7
-----GAGCCCGCCCCGTCCGCGC----- 1
-----GAGCCCGCCCCGTCCGCGCC----- 3

```

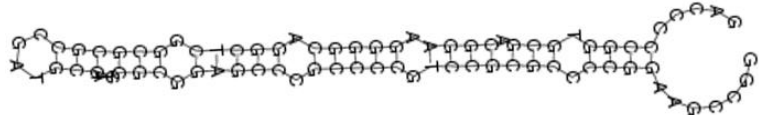

**prv-miR-18**

GTCCGCTCCTCCTCACCCTCGACTCCGTCGAGAGCCGCTCGTCTCTTCTTCCCGCCGGAACACCGAGCGATGGCTCCCGGGA 9  
 . ((((((..... ((( (( ( (( (. (((.....))))).)).))))....))))))....)))))) -27.50(kcal/mol)

\*\*\*\*\*GCGCCGAACACCGAGCGATGG\*\*\*\*\* prv-miR-18-3p 6

```

-----CCGCCTCGTCTCCTCTTCT----- 3
-----CGGCCGAACACCGAGCGATGGCTC----- 1
-----GCGCCGAACACCGAGCGATGG----- 3
-----GGCCGGAACACCGAGCGATGGCT----- 2

```

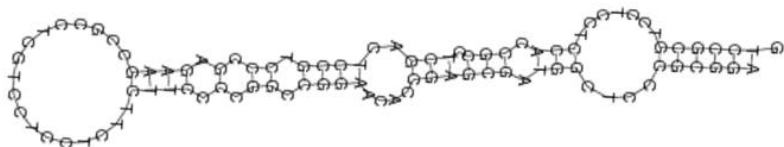

**prv-miR-19**

CGCCGCGTACGGAGCGCCTGGACGCCGCGGCACGTGCGGAGGCCGCGGCTCGGCGCGCCGGCGCCCGGCGA 104



```
-----CGTGCTGGCCGTGGTCGACGA----- 21
-----CGTGCTGGCCGTGGTCGACGAC----- 6
-----CGTGCTGGCCGTGGTCGACGACG----- 1
-----TGCTGGCCGTGGTCGACGACGA----- 7
-----CTGGCCGTGGTCGACGACGA----- 1
```

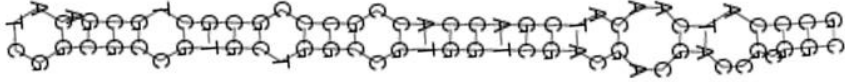

**prv-miR-21**

GCGCCGCGCAGGCGCACGACGCGCCGCGAGACCGCGCCGCCCGGCCGCGTCCGCCCGGCGCACGCGCCGGGGCGAGGGCGTCCCCGGGGCGG 8  
. (((. ((. ((((. (((. ((((((. ((. ((. ((((((. ...)))))).)))).)))...)))...)))).) -64.00(kcal/mol)

\*\*\*\*\*CACGCGCGGGGGCGAGGGCGTCC\*\*\*\*\* prv-miR-21-3p 7  
-----AGCACC GCGCGCCGCCGCGCC----- 1  
-----CACGCGCGGGGGCGAGGGCGTCC----- 7

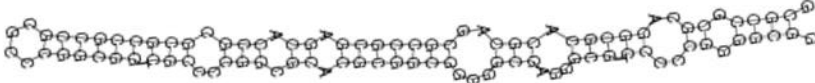

**prv-miR-22**

CCGCCGGGTTCGGGCCCTGCTCGGCCTGCCGGGCGACGCGCCGCCCGACGGGCTGGTGCGGACGCGCCCGGCG 105  
. ((((((. ... ((. ((. ((((((. ((((((. ((. ((((((. ...)))))).)))).)))...)))...)))).) -50.10(kcal/mol)

\*\*\*\*\*CCCGACGGGCTGGTGCGGACG\*\*\*\*\* prv-miR-22-3p 105

```
-----GCCGACGGGCTGGTGCGGA----- 1
-----CCCGACGGGCTGGTGCGGAC----- 1
-----CCCGACGGGCTGGTGCGGACG----- 72
-----CCCGACGGGCTGGTGCGGACGC----- 17
-----CCCGACGGGCTGGTGCGGACGCG----- 4
-----CCCGACGGGCTGGTGCGGACGCG----- 7
-----CCCGACGGGCTGGTGCGGACGCG----- 2
-----GACGGGCTGGTGCGGACGCG----- 1
```

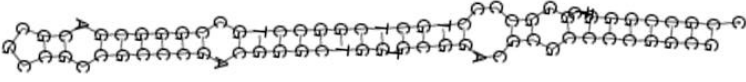

prv-miR-23

AGTACATCGACTGGATCGTGTGCCTCGGCGTGGTCCCGGTGCGCCGGGCGCGCCCCGGGGGAAGCGG 11  
 ..... ((. ((((. ((((((. ((((((. ....)))))))))))).)))).)..... -30.20(kcal/mol)  
 \*\*\*\*\*CTGGATCGTGTGCCTCGGCGTG\*\*\*\*\* prv-miR-23-5p 11

-----CGACTGGATCGTGTGCCTCGGC----- 1  
 -----ACTGGATCGTGTGCCTCGGCG----- 2  
 -----CTGGATCGTGTGCCTCGGCGTG----- 4  
 -----CTGGATCGTGTGCCTCGGCGTGGT----- 2  
 -----TGGATCGTGTGCCTCGGCGTG----- 2

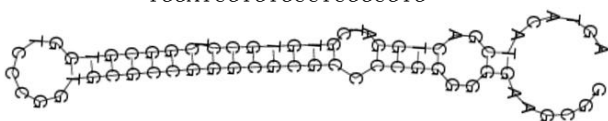

prv-miR-24

GGGCGGCGACGCGCTCGAGCCCGTGATGACGCAGTCCATGGTCTCGTTGAGGGTCTGGATGCACGTGCTCTTGCC 36  
 . ((((((. (((. ((((((. ((((((. ((((((. ....)))))))))))).)))).)..... -33.20(kcal/mol)  
 \*\*\*\*\*CGCGTCGAGCCCGTGATGAC\*\*\*\*\* prv-miR-24-5p 1  
 \*\*\*\*\*CGTTGAGGGTCTGGATGCACG\*\*\*\*\* prv-miR-24-3p 34

-----GACGCGCTCGAGCCCGTGAT----- 1  
 -----ATGGTCTCGTTGAGGGTCTGGA----- 1  
 -----CTCGTTGAGGGTCTGGATGCA----- 1  
 -----TCGTTGAGGGTCTGGATGCAC----- 1  
 -----CGTTGAGGGTCTGGATGC----- 1  
 -----CGTTGAGGGTCTGGATGCA----- 2  
 -----CGTTGAGGGTCTGGATGCACG----- 14  
 -----CGTTGAGGGTCTGGATGCACGT----- 2  
 -----CGTTGAGGGTCTGGATGCACGTGC----- 10  
 -----GTTGAGGGTCTGGATGCACG----- 1  
 -----TTGAGGGTCTGGATGCAC----- 1  
 -----TTGAGGGTCTGGATGCACGTGCT----- 1

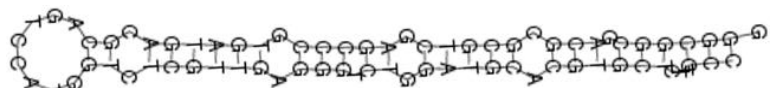

prv-miR-25

TACGGGTTCCACGGGCGCGGGGCGGCCGGCGTTCGACCCGTCCACGTAGATCGCGTCGTCGCCGCCGGGGCCCCACGGGGTGCCCGGG 28  
.. (((((( (. ((((. ((. ( (((((( (. ((((. (((((( (. ((((. ((. (...)).)).)))).)))).)).)))).)).)))).)))).)))).)).. -58.10(kcal/mol)

\*\*\*\*\*ACGGGCGCGGGGCGGCCGG\*\*\*\*\* prv-miR-25-5p 5

```
-----ACGGGCGCGGGGCGGCCGG----- 5  
-----CGCCGTCCACGTAGATCGCGTCGT----- 2  
-----CGCCGTCCACGTAGATCGCGTCGTC----- 1  
-----GCCGTCCACGTAGATCGCGTCG----- 1  
-----CCGTCCACGTAGATCGCGTCGT----- 3  
-----CCGTCCACGTAGATCGCGTCGTC----- 9  
-----TCCACGTAGATCGCGTCGTCGCC----- 1  
-----CCACGTAGATCGCGTCGT----- 3  
-----CACGTAGATCGCGTCGTCGCC----- 2  
-----AGATCGCGTCGTCGCCGCC----- 1
```

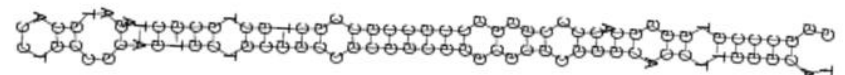

Supplement: pone.0151546.s001.pdf [file pone.0151546.s001.pdf]
